# Supplementary material for: A super-stable homogeneous Lipiodol-hydrophilic chemodrug formulation for treatment of hepatocellular carcinoma
Source: PubMed Central journal article supplement (PMC8825598; doi:10.7150/thno.68456), 2022-01-24
Supplement: thnov12p1769s1.pdf [file thnov12p1769s1.pdf]

## Supplementary Information

### **A superstable homogeneous Lipiodol-hydrophilic chemodrugs formulation for treatment of hepatocellular carcinoma**

Pan He<sup>1,2,#</sup>, En Ren<sup>1,#</sup>, Biaoqi Chen<sup>3,#</sup>, Hu Chen<sup>1,#</sup>, Hongwei Cheng<sup>1</sup>, Xing Gao<sup>1</sup>, Xiaoliu Liang<sup>1</sup>, Hao Liu<sup>3</sup>, Jingdong Li<sup>5</sup>, Bo Li<sup>6</sup>, Aizheng Chen<sup>3</sup>, Chengchao Chu<sup>1,4</sup>, Xiaoyuan Chen<sup>7</sup>, Jingsong Mao<sup>1,2,\*</sup>, Yang Zhang<sup>1,\*</sup>, Gang Liu<sup>1,\*</sup>

<sup>1</sup> State Key Laboratory of Molecular Vaccinology and Molecular Diagnostics, Center for Molecular Imaging and Translational Medicine, School of Public Health, Xiamen University, Xiamen 361102, China.

<sup>2</sup> Department of Radiology, Xiang'an Hospital of Xiamen University, School of Medicine, Xiamen University, Xiamen 361102, China.

<sup>3</sup> Fujian Provincial Key Laboratory of Biochemical Technology, Institute of Biomaterials and Tissue Engineering, Huaqiao University, Xiamen 361021, China.

<sup>4</sup> Amoy Hopeful Biotechnology Co., Ltd., Xiamen 361027, China.

<sup>5</sup> Department of General Surgery, Institute of Hepatobiliary-Pancreatic-Intestinal Diseases, Affiliated Hospital of North Sichuan Medical College, Nanchong 637000, China.

<sup>6</sup> Department of General Surgery (Hepatobiliary Surgery), The Affiliated Hospital of Southwest Medical University, Luzhou 646000, China.

<sup>7</sup> Departments of Diagnostic Radiology, Chemical and Biomolecular Engineering, and Biomedical Engineering, Yong Loo Lin School of Medicine and Faculty of Engineering, National University of Singapore, Singapore, Singapore.

\* Corresponding author. E-mail addresses: maojingsong163@163.com (J. Mao), zhangyang0823@xmu.edu.cn (Y. Zhang), gangliu.cmitm@xmu.edu.cn (G. Liu).

#P. He, E. Ren, B. Chen, and H. Chen contributed equally to this work.

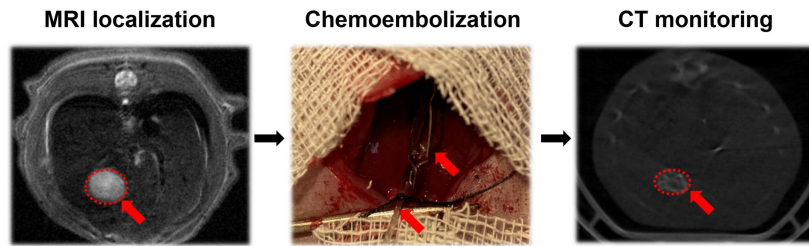

**Figure S1.** Verification of the N1S1 orthotopic models *via* MRI, embolization of SHIFT&DOX and CT monitored embolic evaluation.

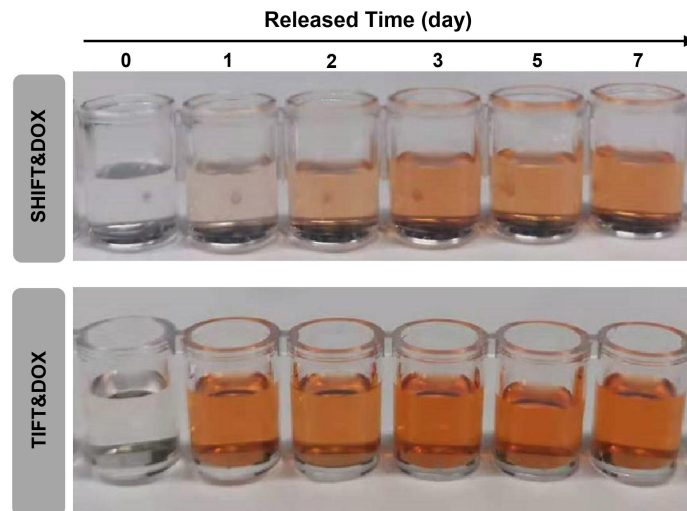

**Figure S2.** The colour photo of drugs release for freeDOX, nanoDOX within 7 days.

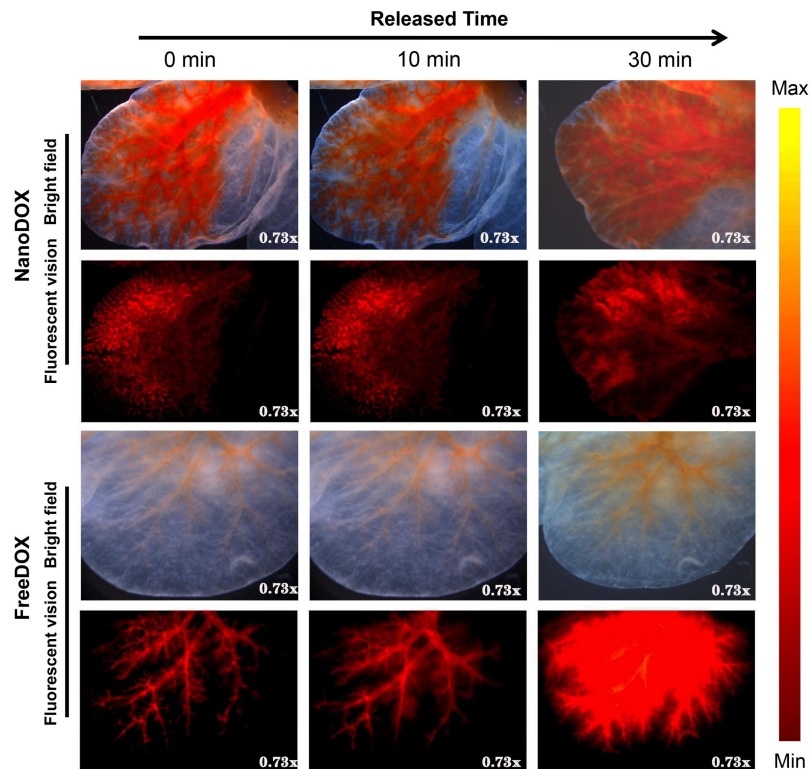

**Figure S3.** The typical fluorescence microscope images of pure water-soluble freeDOX and nanoDOX injection in the decellularized liver venous.

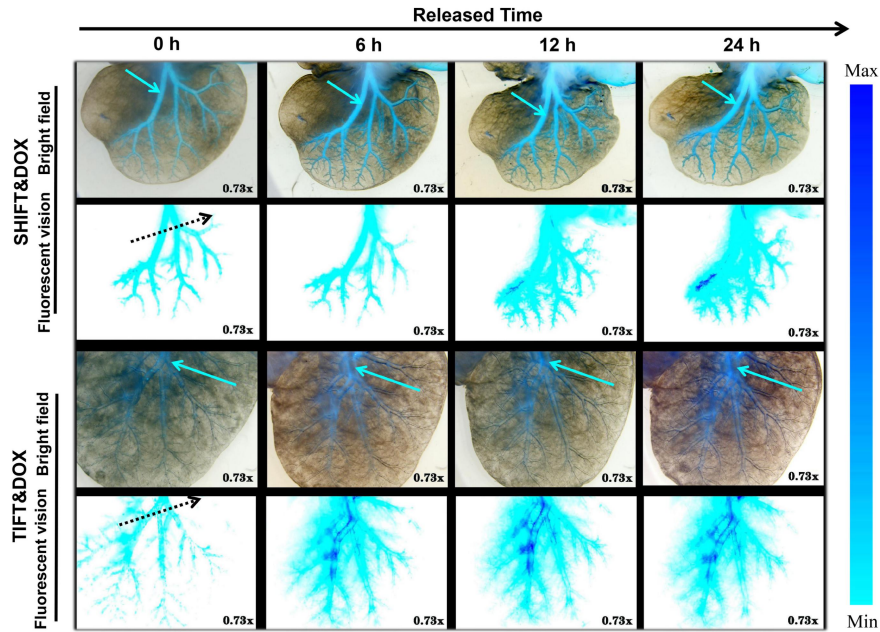

**Figure S4.** Representative SFM images with reverse phase (Adobe Photoshop CC 2019) of DOX released from SHIFT&DOX and TIFT&DOX of newly injected as well as samples stored for 6 h, 12 h, and 24 h.

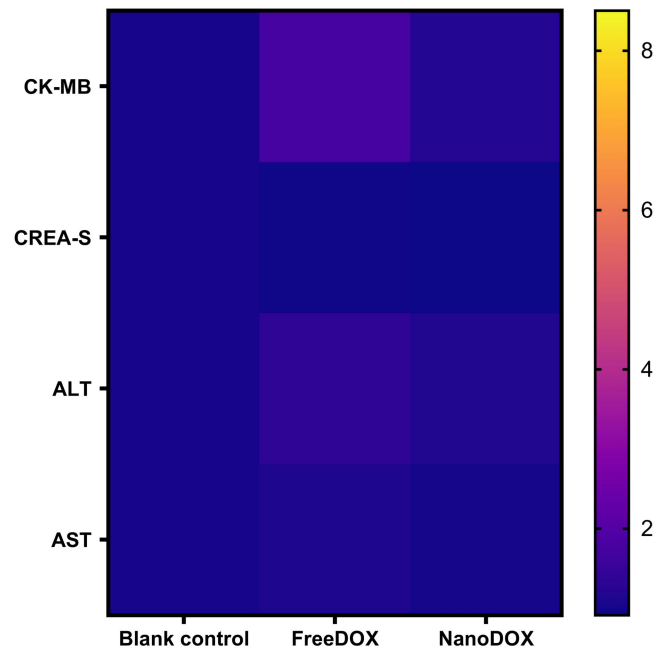

**Figure S5.** The biochemical analysis results of SD rat acute toxicity test on 3 days at the double doses (2 mg).

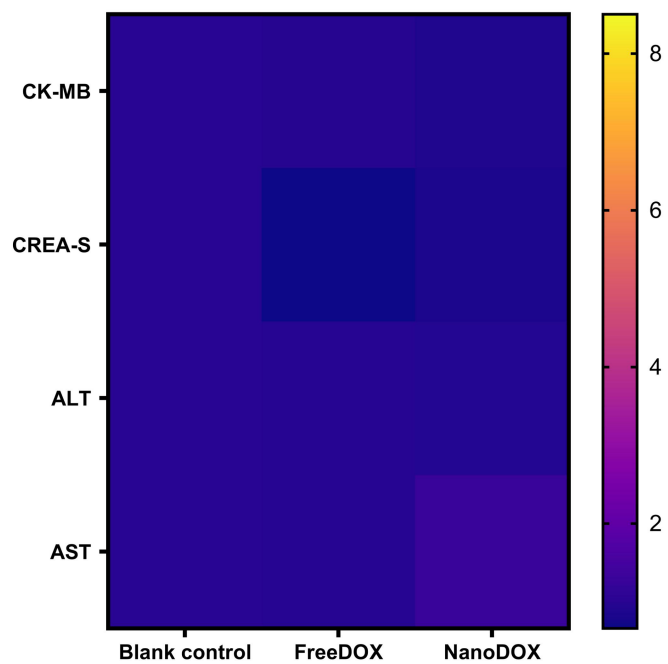

**Figure S6.** The biochemical analysis results of SD rat acute toxicity test on 7 days at the double doses (2 mg).

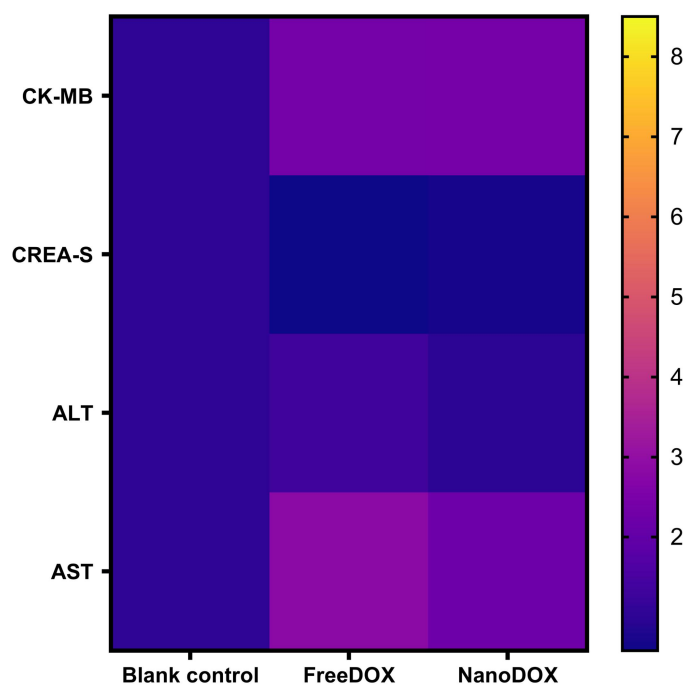

**Figure S7.** The biochemical analysis results of SD rat acute toxicity test on 3 days at the quadruple doses (4 mg).

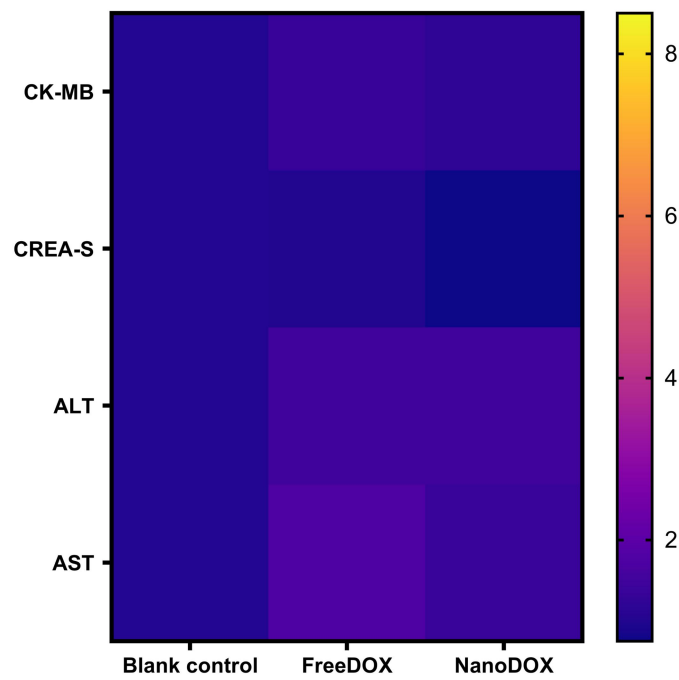

**Figure S8.** The biochemical analysis results of SD rat acute toxicity test on 7 days at the quadruple doses (4 mg).

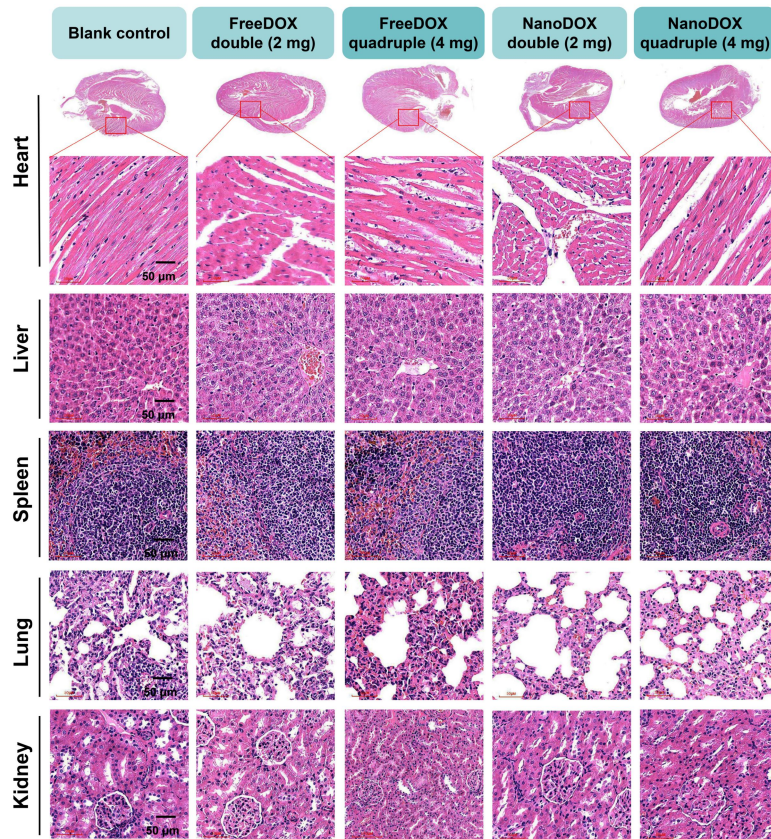

**Figure S9.** The H&E tissue staining of heart, liver, spleen, lung and kidney of SD rat acute toxicity test on 7 days after TACE.

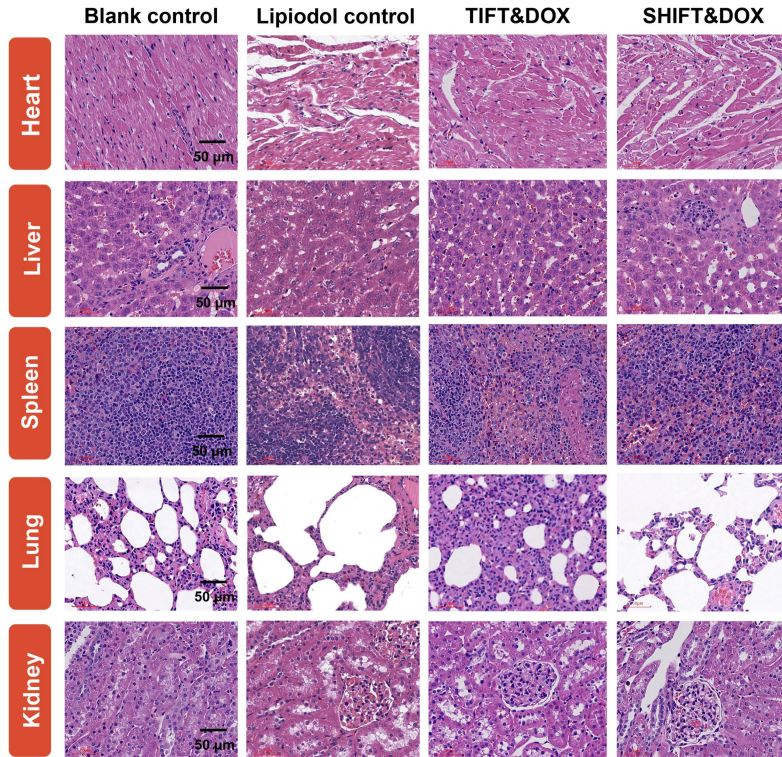

**Figure S10.** The H&E tissue staining of heart, liver, spleen, lung and kidney of the rabbit model on 10 days after TACE.

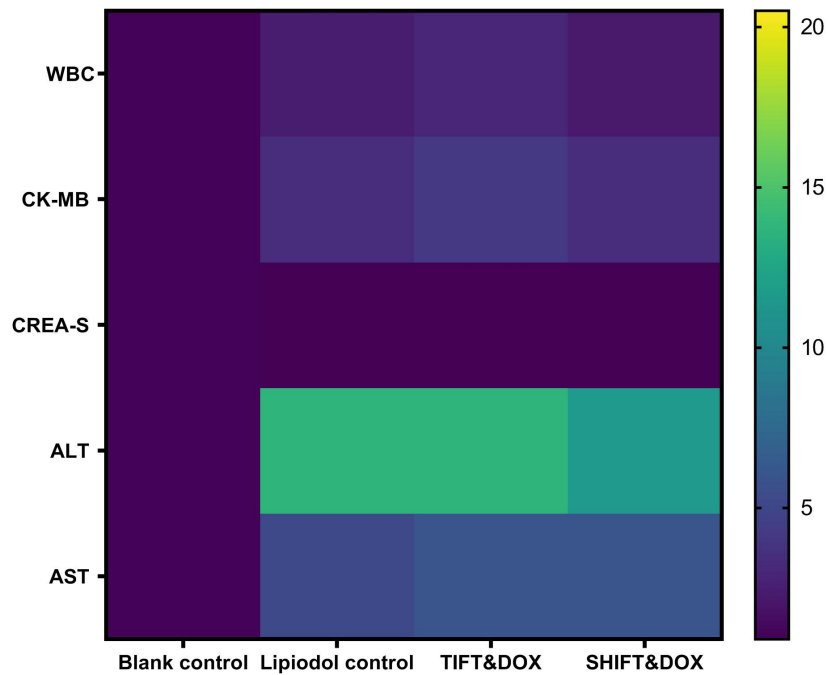

**Figure S11.** The blood cells and biochemical analysis results on 3 days after TACE.

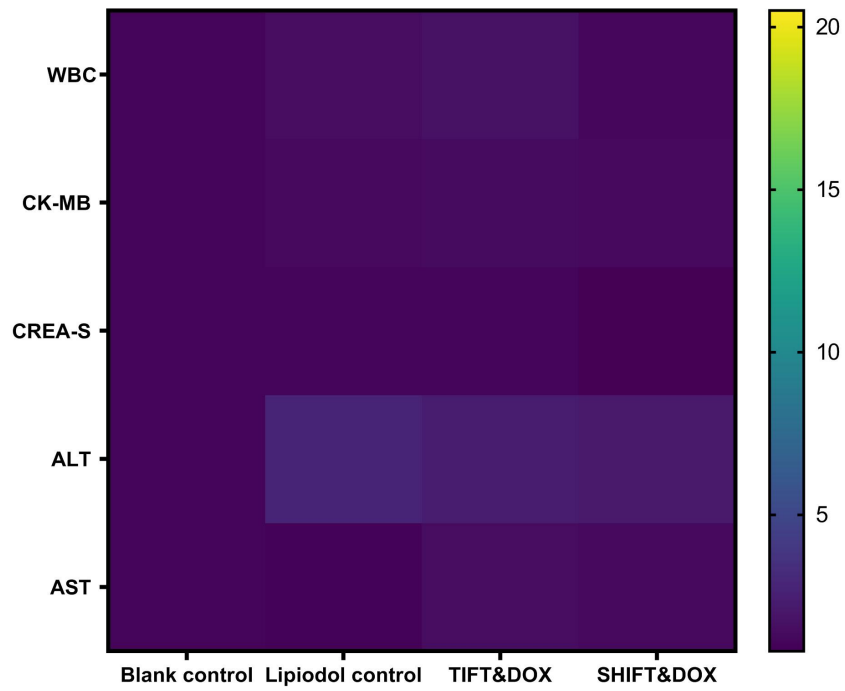

**Figure S12.** The blood cells and biochemical analysis results on 7 days after TACE.

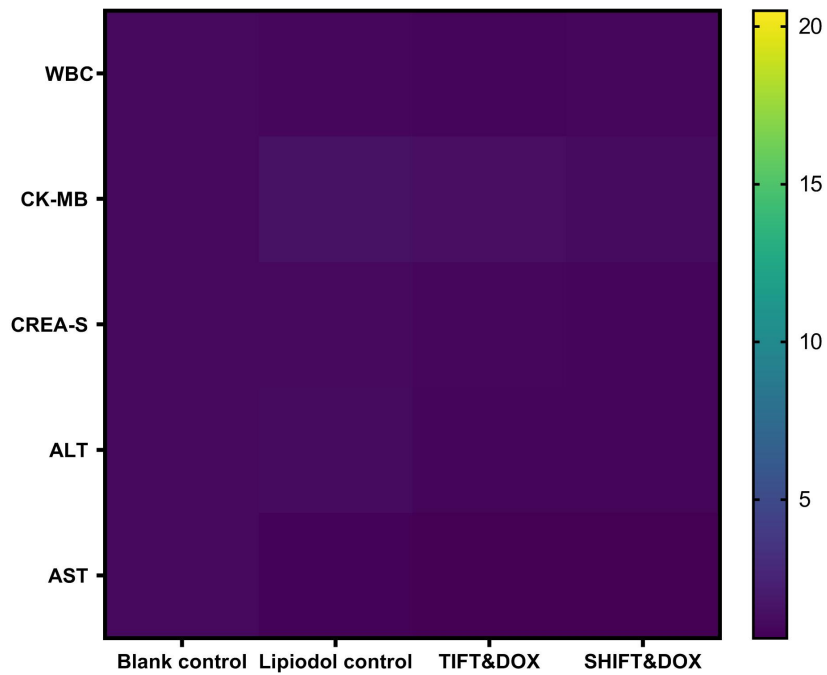

**Figure S13.** The blood cells and biochemical analysis results on 10 days after TACE.
